# Supplementary material
Source: publisher site journal article supplement (https://www.spandidos-publications.com/8185/downloadSupplementary)

Figure S1. Representative agarose gel electrophoresis of PCR-restriction fragment length polymorphism genotyping for cyclooxygenase-2. Polymorphisms of (A) rs689466, (B) rs2066826 and (C) rs20417. Fragment sizes for each genotype are indicated. Undigested PCR products are shown for reference.

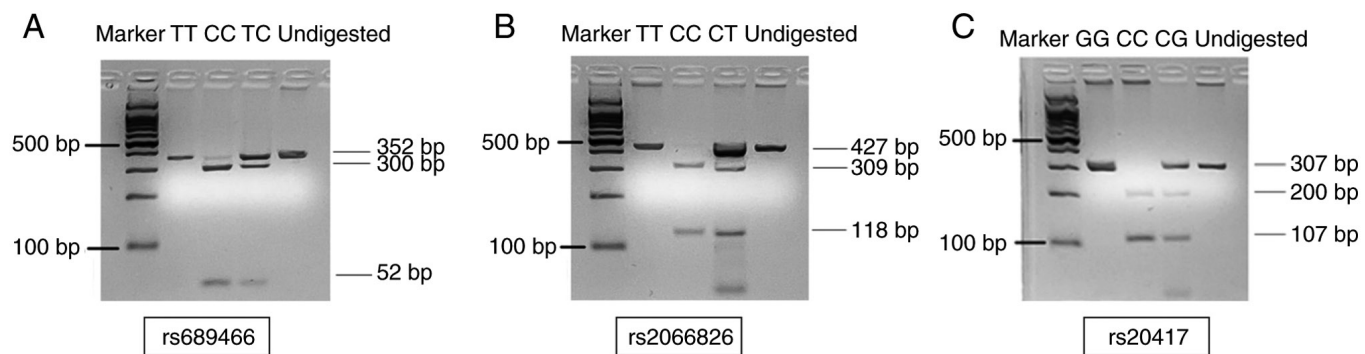

Supplement: Supplementary file 1 [file downloadSupplementary]
